# Supplementary material for: Ethyl Acetate Fraction of Amomum villosum var. xanthioides Attenuates Hepatic Endoplasmic Reticulum Stress-Induced Non-Alcoholic Steatohepatitis via Improvement of Antioxidant Capacities
Source: MDPI journal article supplement (doi:10.3390/antiox10070998), 2021-06-23
Supplement: s1 [file s1]

# Supplementary information

Supplementary figure 1.

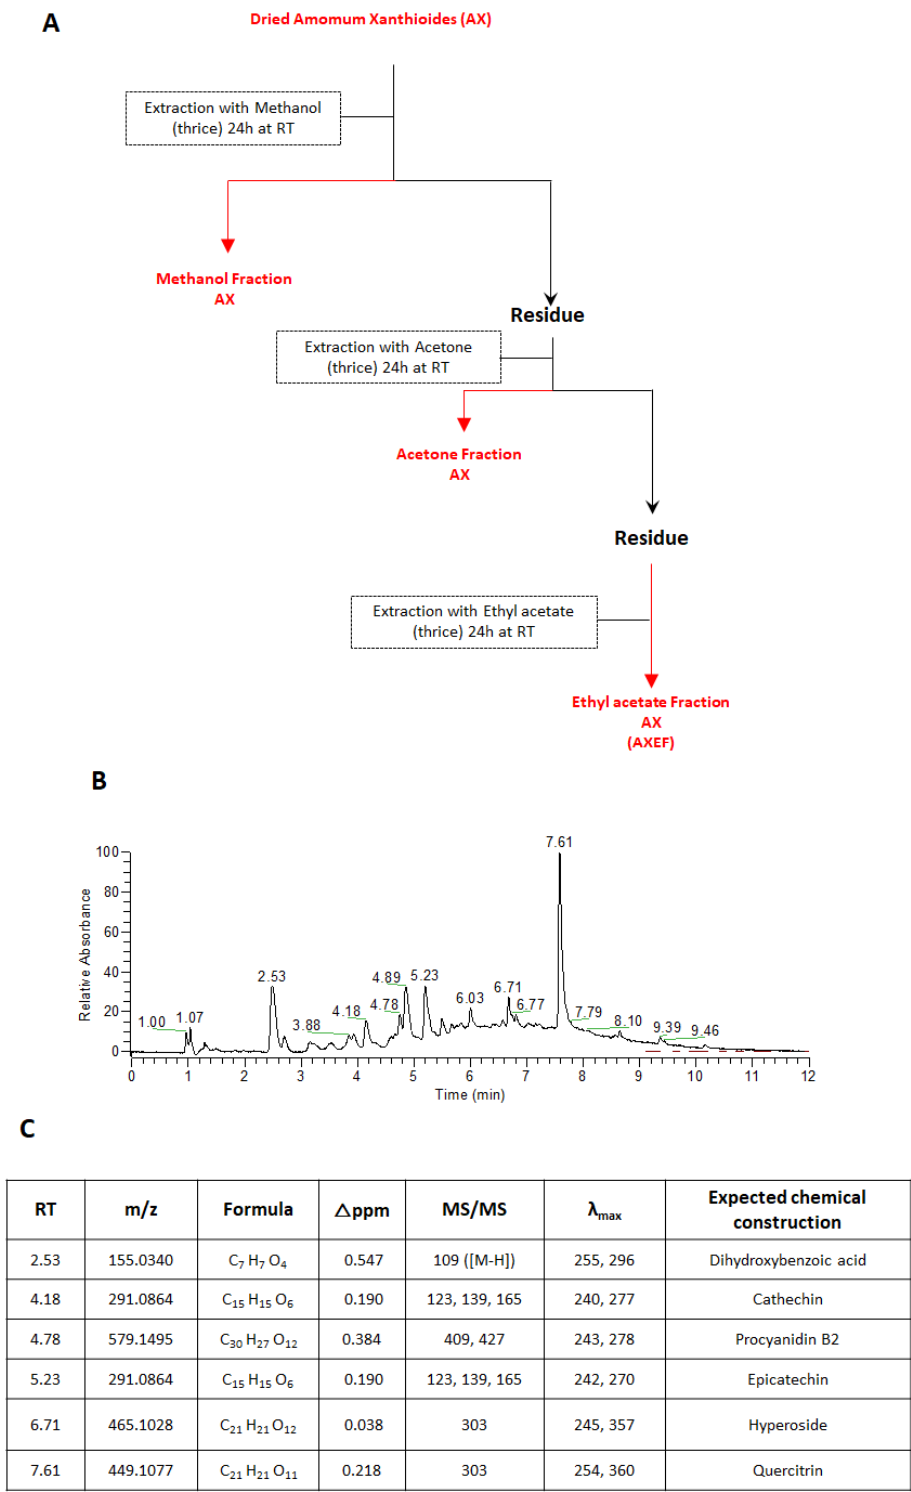

**Supplementary figure 1. Fraction of AXEF and its fingerprinting analysis.** (A) Diagram of obtaining AXEF according to the fractionation relying on the solvent polarity. From methanol extraction to ethyl acetate fraction (AXEF). (B) Two dimensional histogram of AXEF analysis by adaption of ultra-high-performance liquid chromatography-tandem mass spectrometry. (C) Major chemical constructions from AXEF.

**Supplementary figure 2.**

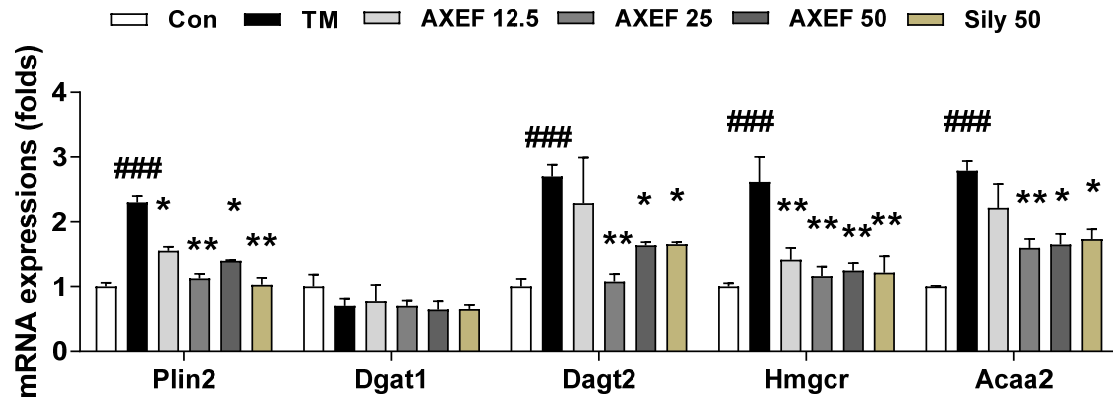

**Supplementary figure 2. Hepatic mRNA expression levels of lipogenesis related genes.** Data were expressed mean  $\pm$  SD (n= 6-8 for each group). #  $P < 0.05$  for the Con vs. TM, \* $P < 0.05$  for TM vs. AXEF or Sily 50. Acaa2; Acetyl-CoA Acyltransferase 2, Dgat; Diglyceride acyltransferase, Plin2; Perlipin2, Hmgcr; 3-hydroxy-3-methylglutaryl coenzyme A reductase,

**Supplementary table 1. Antibody lists**

| Name            | Host | Application | Titer  | Manufacture and Lot. No                                                              |
|-----------------|------|-------------|--------|--------------------------------------------------------------------------------------|
| PERK            | Rb   | WB          | 1:1000 | CST, PERK (C33E10) Rabbit mAb #3192                                                  |
| p-PERK          | Rb   | WB          | 1:500  | p-PERK-T982, Custom rabbit monoclonal rIgG;<br>LLY-71, clone 1-6<br>Lot #BE02734-048 |
| eIF2 $\alpha$   | Rb   | WB          | 1:1000 | CST, eIF2 $\alpha$ (D7D3) XP® Rabbit mAb, #5324                                      |
| p-eIF2 $\alpha$ | Rb   | WB          | 1:500  | CST, Phospho-eIF2 $\alpha$ (Ser51) (D9G8) XP®<br>Rabbit mAb, #3398                   |
| Bax             | Ms   | WB          | 1:1000 | Thermo Fischers, Bax Monoclonal Antibody<br>(6A7), MA5-14003                         |
| Bcl-XL          | Ms   | WB          | 1:1000 | Thermo Fischers, Bcl-xL Monoclonal Antibody<br>(7D9), MA5-11950                      |
| Bcl2            | Ms   | WB          | 1:1000 | Thermo Fischers, Bcl-2 Monoclonal Antibody<br>(100/D5), MA5-11757                    |
| MTs             | Ms   | WB          | 1:500  | Enzo Life, ADI-SPA-550-D                                                             |
| MTF1            | Rb   | WB          | 1:500  | Fishers, PIPA555945                                                                  |
| Actinin         | Rb   | WB          | 1:3000 | Santa Cruz Biotechnology, sc-7454-R, alpha-<br>Actinin (C-20)-R                      |
| 4-HNE           | Ms   | IHC         | 1:200  | R&D, MAB3249,                                                                        |
| $\gamma$ H2AX   | Rb   | IF          | 1:200  | CST, Phospho-Histone H2A.X (Ser139/Tyr142)<br>Antibody, #5438                        |

PERK; protein kinase R (PKR)-like endoplasmic reticulum kinase, eIF2 $\alpha$ ; Eukaryotic translation initiation factor 2A, Bcl2; Bcl-2 (B-cell lymphoma, Bax; BCL2 Associated X, Apoptosis Regulator, Bcl-XL; B-cell lymphoma-extra-large, MTs; Metallothioneins, MTF1; Metal regulatory transcription factor 1, 4-HNE; 4-hydroxy-2-nonenal,  $\gamma$ H2AX; phosphor- H2A histone family member X

**Supplementary table 2. Primer lists**

| Gene name  | Sequence (5' to 3')                              | Application                  |
|------------|--------------------------------------------------|------------------------------|
| Grp78/Bip  | 5'-GTG TGT GAG ACC AGA ACC GT-3'                 | qPCR                         |
|            | 5'-GCA GTC AGG CAG GAG TCT TA-3'                 |                              |
| Ddit3/Chop | 5'-TCT TGA GCC TAA CAC GTC GAT-3'                |                              |
|            | 5'-CCA GGT TCT CTC TCC TCA GGT-3'                |                              |
| Tnfa       | 5'- TGCCTATGTCTCAGCCTCTTC-3'                     |                              |
|            | 5'- GGAGGCCATTTGGGAACT-3'                        |                              |
| Il6        | 5'- CAA AGC CAG AGT CCT TCA GAG-3'               |                              |
|            | 5'- GAG CAT TGG AAA TTG GGG TA-3'                |                              |
| Il1b       | 5'- TGT GAA ATG CCA CCT TTT GA-3'                |                              |
|            | 5'- GGT CAA AGG TTT GGA AGC AG-3'                |                              |
| Il10       | 5'- CAG AGC CAC ATG CTC CTA GA-3'                |                              |
|            | 5'- GCT TGG CAA CCC AAG TAA CC-3'                |                              |
| Plin2      | 5'- TCCACTGTCCACCTGATTGA-3'                      |                              |
|            | 5-TGGCATGTAGTCTGGAGCTG-3'                        |                              |
| Dgat1      | 5'-TCC GCC TCT GGG CAT TC-3'                     |                              |
|            | 5'-AGA ATC GGC CCA CAA TCC A-3'                  |                              |
| Dgat2      | 5'-CAAGAAAGGTGGCAGGAGAT-3'                       |                              |
|            | 5'-GTGGTCAGCAGGTTGTGTGT-3'                       |                              |
| Hmgcr      | 5'- ATCCTGACGATAACGCGGTG-3'                      |                              |
|            | 5'- AAGAGGCCAGCAATACCCAG-3'                      |                              |
| Acaa2      | 5'- CCCTGCTACGAGGTGTGTTC-3'                      |                              |
|            | 5'- ACATTGCCCACGATGACACT-3'                      |                              |
| Mt1-Pro    | 5'-AAT TGC TAG CGG AAA GCA CTA TAG GGA CAT GA-3' | Gene promoter reporter assay |
|            | 5'-AAT TCT CGA GTC TTT ATA GTC GTT GGA CGA GT-3' |                              |
| Mt2-Pro    | 5'-AAT TGC TAG CGG ATC GCA GAC CCT TTG C-3'      |                              |
|            | 5'-AAT TCT CGA GCC TTT ATA GCG GAG AGT ATT GG-3' |                              |
| β-actin    | 55'- GGC ACCACACCTTCTACAATGA-3'                  | qPCR                         |
|            | 5'- ATCTTTTCACGGTTGGCCTTAG-3'                    |                              |

Acac2; Acetyl-CoA Acyltransferase 2, Ddit3; DNA damage-inducible transcript 3, Chop; C/EBP homologous protein, Dgat; Diglyceride acyltransferase, Plin2; Perlin2, Hmgcr; 3-hydroxy-3-methylglutaryl coenzyme A reductase, Tnf; tumor necrosis factor, Il; interleukin
